# Supplementary material for: NELL1-Associated Membranous Glomerulopathy After Hematopoietic Stem Cell Transplantation
Source: PubMed Central journal article supplement — Kidney Int Rep. 2021 May 4;6(7):1992–5. doi: 10.1016/j.ekir.2021.04.033 (PMC8258497; doi:10.1016/j.ekir.2021.04.033), 2021-05-04
Supplement: mmc1.pdf [file mmc1.pdf]

## Supplemental References

- S1. Brukamp K, Doyle AM, Bloom RD, *et al.* Nephrotic syndrome after hematopoietic cell transplantation: do glomerular lesions represent renal graft-versus-host disease? *Clin J Am Soc Nephrol* 2006; **1**: 685-694.
- S2. Byrne-Dugan CJ, Collins AB, Lam AQ, *et al.* Membranous nephropathy as a manifestation of graft-versus-host disease: association with HLA antigen typing, phospholipase A2 receptor, and C4d. *Am J Kidney Dis* 2014; **64**: 987-993.
- S3. Chang A, Hingorani S, Kowalewska J, *et al.* Spectrum of renal pathology in hematopoietic cell transplantation: a series of 20 patients and review of the literature. *Clin J Am Soc Nephrol* 2007; **2**: 1014-1023.
- S4. Hiramatsu R, Ubara Y, Sawa N, *et al.* Clinicopathological analysis of allogeneic hematopoietic stem cell transplantation-related membranous glomerulonephritis. *Hum Pathol* 2016; **50**: 187-194.
- S5. Troxell ML, Higgins JP, Kambham N. Renal pathology associated with hematopoietic stem cell transplantation. *Adv Anat Pathol* 2014; **21**: 330-340.
- S6. Hu SL. The role of graft-versus-host disease in haematopoietic cell transplantation-associated glomerular disease. *Nephrol Dial Transplant* 2011; **26**: 2025-2031.
- S7. Hiesse C, Goldschmidt E, Santelli G, *et al.* Membranous nephropathy in a bone marrow transplant recipient. *Am J Kidney Dis* 1988; **11**: 188-191.
- S8. Fraile P, Vazquez L, Caballero D, *et al.* Chronic graft-versus-host disease of the kidney in patients with allogeneic hematopoietic stem cell transplant. *Eur J Haematol* 2013; **91**: 129-134.
